# Supplementary material for: Implementation strategies to increase human papillomavirus vaccination uptake for adolescent girls in sub-Saharan Africa: A scoping review protocol
Source: medRxiv preprint, doi:10.1101/2022.04.19.22273815, version 1 (2022-04-20)
Supplement: S2 Appendix 2 data extraction form [file 273815_file03.docx]

| First Author full names, publication year, country | Year of study | Title | Type of programme | Study design* | Sample size | Targeted stakeholder | Frame work | Age of girls/school grade | Funding source | Data collecting tool | Implementation strategies | HPV vaccine coverage | HPV vaccine uptake |
| --- | --- | --- | --- | --- | --- | --- | --- | --- | --- | --- | --- | --- | --- |
|  |  |  |  |  |  |  |  |  |  |  |  |  |  |
|  |  |  |  |  |  |  |  |  |  |  |  |  |  |

**SAMPLE DATA CHARTING FORM**
